# Supplementary material for: LF-MF inhibits iron metabolism and suppresses lung cancer through activation of P53-miR-34a-E2F1/E2F3 pathway
Source: PubMed Central journal article supplement (PMC5429732; doi:10.1038/s41598-017-00913-2), 2017-04-07
Supplement: 41598_2017_913_MOESM1_ESM.pdf [file 41598_2017_913_MOESM1_ESM.pdf]

**LF-MF inhibits iron metabolism and suppresses lung cancer through activation  
of P53-miR-34a-E2F1/E2F3 pathway**

Jing Ren, Liang Ding, Qianyun Xu, Guoping Shi, Xiaojing Li, Xiujun Li, Jianjian Ji, Dongya  
Zhang, Yaping Wang, Tingting Wang, Yayi Hou

**Magnetic field exposure system. Fig.S1**

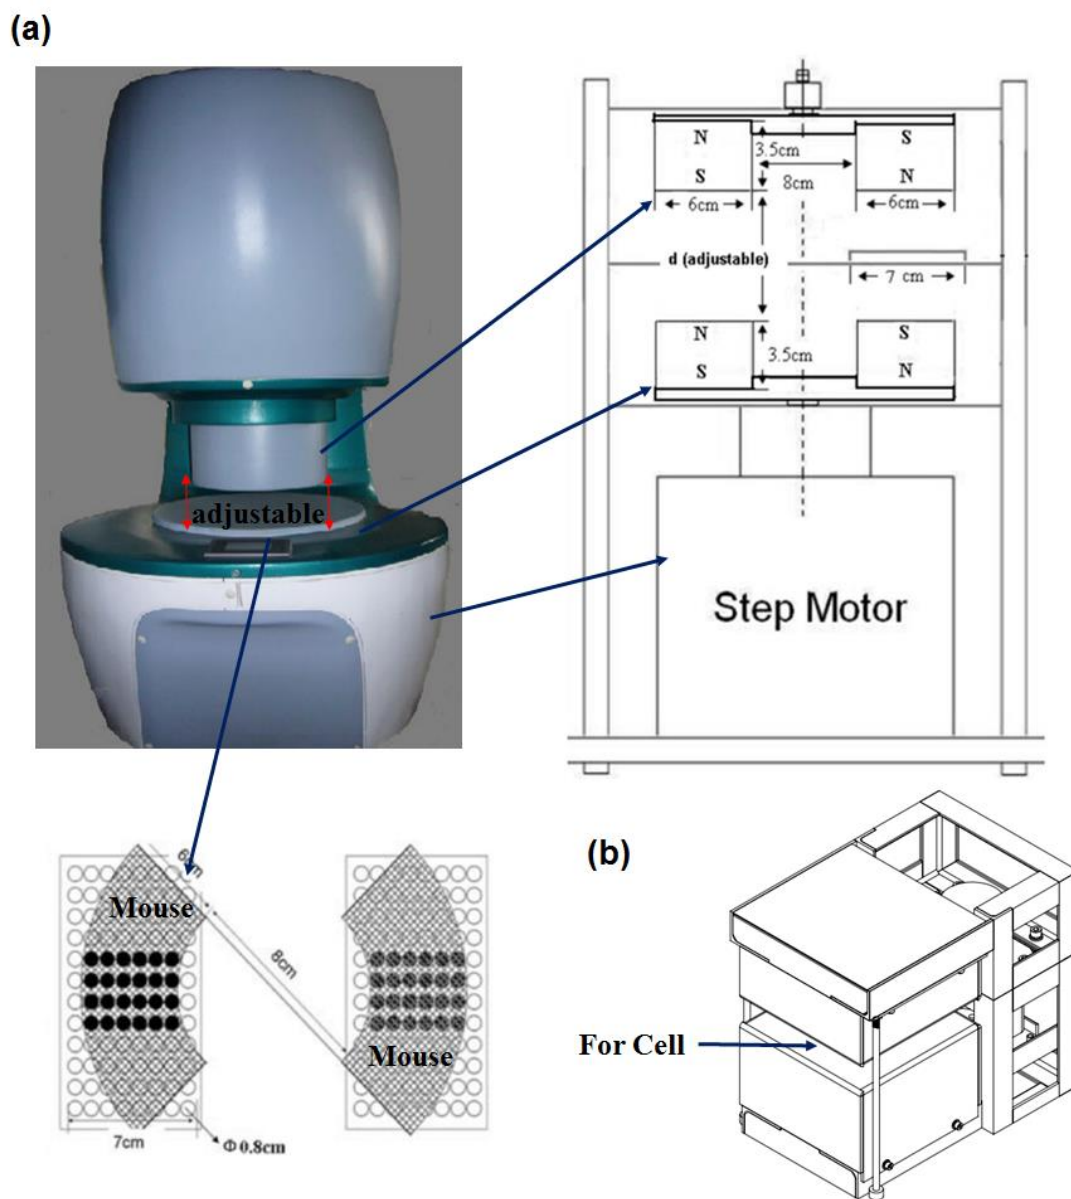

**Fig.S1. Magnetic field exposure system.**

**(a)** Instrument of magnetic field exposure system. Two pairs of fan-shaped NdFeB permanent magnets were arranged to establish magnetic fields. MF at the target site is alternative pulses with a maximum flux density of about 0.4 T. **(b)** The smaller instrument with similar structure to generate 0.4 T and 7.5 Hz LF-MF installed in Thermo Scientific Forma Series II 3120 Water-Jacketed CO<sub>2</sub> Incubators.
